# Supplementary material for: Morphological and Physiological Screening to Predict Lettuce Biomass Production in Controlled Environment Agriculture
Source: MDPI journal article supplement (doi:10.3390/rs14020316), 2022-01-11
Supplement: s1 [file s1]

Archive with 1 entries (1 files):
- remotesensing-1517364-supplementary.pdf
